# Supplementary material for: Psychosocial Model of Burnout among Humanitarian Aid Workers in Bangladesh: Role of Workplace Stressors and Emotion Coping
Source: Research Square preprint supplement (doi:10.21203/rs.3.rs-2073274/v1), 2023-03-17
Supplement: Supplementary file [file 2a8e91c1006b07c62e45bad2.pdf]

### Additional file 1

#### COPSOQ III - Adapted

The following questions are about your psychosocial work environment. Please answer with the option that best fits your view.

|     |                                                                                      | Never | Sometimes | Often | Always |
|-----|--------------------------------------------------------------------------------------|-------|-----------|-------|--------|
| 1.  | I do not have time to complete all my work tasks.                                    | 0     | 1         | 2     | 3      |
| 2.  | I struggle with meeting deadlines.                                                   | 0     | 1         | 2     | 3      |
| 3.  | I have difficulties keeping up with the pace of work.                                | 0     | 1         | 2     | 3      |
| 4.  | I have to work at a high pace throughout the day.                                    | 0     | 1         | 2     | 3      |
| 5.  | I have to deal with other people's personal problems as part of my work.             | 0     | 1         | 2     | 3      |
| 6.  | I find my work emotionally demanding.                                                | 0     | 1         | 2     | 3      |
| 7.  | I find that my work requires me to hide my feelings.                                 | 0     | 1         | 2     | 3      |
| 8.  | I do not have a large degree of influence on the decisions concerning my work.       | 0     | 1         | 2     | 3      |
| 9.  | I cannot influence the amount of work assigned to me.                                | 0     | 1         | 2     | 3      |
| 10. | I do not learn new skills and knowledge through my work.                             | 0     | 1         | 2     | 3      |
| 11. | I am asked to perform duties outside of my professional training.                    | 0     | 1         | 2     | 3      |
| 12. | I spend too much time on administrative tasks and not enough time on my core duties. | 0     | 1         | 2     | 3      |
| 13. | I have difficulties advancing                                                        | 0     | 1         | 2     | 3      |

|            |                                                                                                                      |   |   |   |   |
|------------|----------------------------------------------------------------------------------------------------------------------|---|---|---|---|
|            | <b>my career.</b>                                                                                                    |   |   |   |   |
| <b>14.</b> | <b>I have to do overtime.</b>                                                                                        | 0 | 1 | 2 | 3 |
| <b>15.</b> | <b>I do not find my work meaningful.</b>                                                                             | 0 | 1 | 2 | 3 |
| <b>16.</b> | <b>I feel that the work I do is not important.</b>                                                                   | 0 | 1 | 2 | 3 |
| <b>17.</b> | <b>At my workplace, I am informed at the last minute about important decisions, changes or plans for the future.</b> | 0 | 1 | 2 | 3 |
| <b>18.</b> | <b>I receive very little direction and information from the management/supervisor to do my work well.</b>            | 0 | 1 | 2 | 3 |
| <b>19.</b> | <b>I am not sure what is expected of me at work.</b>                                                                 | 0 | 1 | 2 | 3 |
| <b>20.</b> | <b>My work is not recognized nor appreciated by the management/supervisor.</b>                                       | 0 | 1 | 2 | 3 |
| <b>21.</b> | <b>I am worried about becoming unemployed.</b>                                                                       | 0 | 1 | 2 | 3 |
| <b>22.</b> | <b>I am worried about being transferred to another job or mission against my will.</b>                               | 0 | 1 | 2 | 3 |
| <b>23.</b> | <b>I feel that my work drains so much of my <u>energy</u> that it has a negative effect on my private life.</b>      | 0 | 1 | 2 | 3 |
| <b>24.</b> | <b>I feel that my work takes so much of my <u>time</u> that it has a negative effect on my private life.</b>         | 0 | 1 | 2 | 3 |
| <b>25.</b> | <b>Conflicts and misunderstandings in the workplace are not resolved in a fair way.</b>                              | 0 | 1 | 2 | 3 |
| <b>26.</b> | <b>Work is not distributed fairly.</b>                                                                               | 0 | 1 | 2 | 3 |

|            |                                                                                                                                                                                                                                                                                                               |   |   |   |   |
|------------|---------------------------------------------------------------------------------------------------------------------------------------------------------------------------------------------------------------------------------------------------------------------------------------------------------------|---|---|---|---|
| <b>27.</b> | <b>I am pleased with my job as a whole after taking everything into consideration.</b>                                                                                                                                                                                                                        | 0 | 1 | 2 | 3 |
| <b>28.</b> | <b>I receive untoward sexual advances at my workplace.</b>                                                                                                                                                                                                                                                    | 0 | 1 | 2 | 3 |
|            | If response is 1, 2, or 3 for Q27, follow up with: From whom did you receive untoward sexual advances from? (multiple response options): Colleagues; Manager/supervisor; Subordinates; Beneficiaries/clients; Do not want to say                                                                              |   |   |   |   |
| <b>29.</b> | <b>I am exposed to threats of violence at my workplace.</b>                                                                                                                                                                                                                                                   | 0 | 1 | 2 | 3 |
|            | If response is 1, 2, or 3 for Q28, follow up with: What kind of violence were you exposed to? (multiple response options): Physical violence; Verbal abuse; By colleagues; By manager/supervisor; By subordinates; By beneficiaries/clients; Do not want to say                                               |   |   |   |   |
| <b>30.</b> | <b>I am exposed to bullying (i.e., unpleasant and degrading treatment) at my workplace.</b>                                                                                                                                                                                                                   | 0 | 1 | 2 | 3 |
|            | If response is 1, 2, or 3 for Q29, follow up with: Who were you bullied by? (multiple response options): Colleagues, Manager/supervisor, Subordinates, Beneficiaries/clients, Do not want to say.                                                                                                             |   |   |   |   |
| <b>31.</b> | <b>I have a difficult time at work because of discrimination.</b>                                                                                                                                                                                                                                             | 0 | 1 | 2 | 3 |
|            | If response is 1, 2, or 3 for Q30, follow up with: I faced discrimination because of my (multiple response options): Physical disability; Mental health problems; Race and/or ethnic group; Nationality; Age; Gender; Sexual orientation; Pregnancy or parenthood; Other (please specify); Do not want to say |   |   |   |   |
