# Supplementary material for: Psychosocial Model of Burnout among Humanitarian Aid Workers in Bangladesh: Role of Workplace Stressors and Emotion Coping
Source: Research Square preprint supplement (doi:10.21203/rs.3.rs-2073274/v1), 2023-03-17
Supplement: Supplementary file [file a622d5552921c28763b4787b.pdf]

## Additional file 2

### *Percentage reporting Frequency of Exposure to Types of Adversities*

| Type of Adversity                                                                 | %    |
|-----------------------------------------------------------------------------------|------|
| Poor Living Conditions                                                            |      |
| Travel difficulties due to safety restrictions and road conditions                | 78.4 |
| Lack of access to recreational activities                                         | 68.1 |
| Lack of access to mental health care                                              | 66.1 |
| Inadequate mobile and internet connection                                         | 62.9 |
| Lack of adequate health insurance                                                 | 57.7 |
| Financial concerns                                                                | 53.6 |
| Lack of access to primary care and specialist treatments                          | 53.6 |
| Lack of privacy (e.g., shared sanitary, shower facilities)                        | 36.1 |
| Lack of access to basic amenities (e.g., shelter, bank, mosque, church)           | 34.0 |
| Shortage of food and/or clean water                                               | 32.0 |
| Lack of personal protective equipment (e.g., surgical masks, scrubs)              | 29.9 |
| Interpersonal Stressors                                                           |      |
| Worrying about wellbeing of family members/children                               | 86.6 |
| Having difficulties socializing or making new friends                             | 72.2 |
| Feeling isolated                                                                  | 74.2 |
| Being separated from family members, friends, community due to work               | 81.4 |
| Acculturation or adjustment problems                                              | 66.0 |
| Exposure to PTEs                                                                  |      |
| Missing or lost loved ones/friends/colleagues                                     | 58.8 |
| Death of loved ones/friends/colleagues                                            | 51.5 |
| Witnessing suffering or death of persons of concern                               | 49.5 |
| Gender-based violence                                                             | 42.3 |
| Having to flee suddenly or displacement                                           | 25.8 |
| Threats of malicious acts (e.g., armed robbery, carjacking)                       | 21.7 |
| Threats of attacks or violence due to political instability (e.g., armed militia) | 11.4 |
| Shellings, bombings, or explosions                                                | 8.3  |
| Environmental Stressors                                                           |      |
| Threats of life-threatening or deadly diseases (e.g., COVID-19)                   | 80.4 |
| Extreme weather conditions (e.g., heat, rain, cold)                               | 73.2 |
| Threats of environmental, natural, or man-made hazards (e.g., landslide)          | 59.8 |

*Note.* Percentages reflect those who reported moderate and high frequency of exposure to types of common adversities, in descending order.  $N = 97$ .
