# Supplementary material for: Psychosocial Model of Burnout among Humanitarian Aid Workers in Bangladesh: Role of Workplace Stressors and Emotion Coping
Source: Research Square preprint supplement (doi:10.21203/rs.3.rs-2073274/v1), 2023-03-17
Supplement: Supplementary file [file cb68a64839344a08e711e1c5.pdf]

### Additional file 3

#### *Psychosocial Model for Psychological Distress*

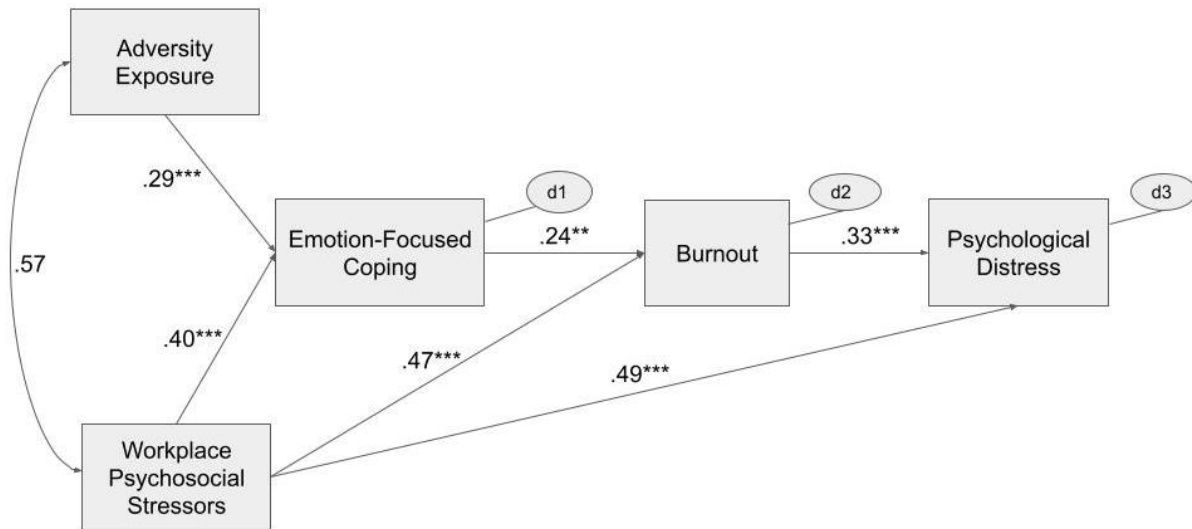

*Note.* Model fit was poor and model was not preferred over integrated model for burnout.  $N = 111$ ,  $n = 5,000$  bootstrap replications. Coefficients standardized. Non-significant paths removed. One-way arrows represent paths; two-way arrows represent covariances;  $d$  represent disturbances of endogenous variables (i.e., all unmeasured exogenous variables, random, and measurement errors).

\*  $p < .05$ ; \*\*  $p < .01$ ; \*\*\*  $p < .001$ .

*Decomposition of Effects from Psychosocial Model for Psychological Distress*

| Effect                                                    | $\beta$               | <i>B</i>  | SE              | 95% CI<br>[LL, UL] | <i>p</i> |
|-----------------------------------------------------------|-----------------------|-----------|-----------------|--------------------|----------|
| <b>Direct Effects</b>                                     |                       |           |                 |                    |          |
| Adversity Exposure → EmoCope                              | .29                   | 0.18      | 0.06            | [0.06, 0.29]       | .006     |
| Workplace Stressors → EmoCope                             | .40                   | 0.19      | 0.05            | [0.11, 0.29]       | < .001   |
| Adversity Exposure → Burnout                              | .41                   | 0.25      | 0.15            | [-0.05, 0.56]      | .114     |
| Workplace Stressors → Burnout                             | .15                   | 0.50      | 0.13            | [0.26, 0.77]       | < .001   |
| EmoCope → Burnout                                         | .19                   | 0.49      | 0.24            | [0.04, 0.96]       | .035     |
| Adversity Exposure → Distress                             | .01                   | < 0.01    | 0.04            | [-0.08, 0.09]      | .936     |
| Workplace Stressors → Distress                            | .49                   | 0.17      | 0.05            | [0.09, 0.27]       | .001     |
| Burnout → Distress                                        | .33                   | 0.10      | 0.03            | [0.03, 0.16]       | .007     |
| <b>Indirect Effects</b>                                   |                       |           |                 |                    |          |
| Adversity Exposure → Distress via<br>EmoCope and Burnout  | .02                   | 0.01      | 0.01            | [0.01, 0.03]       | .011     |
| Adversity Exposure → Distress via Burnout                 | <.01                  | 0.02      | 0.02            | [0.00, 0.07]       | .048     |
| Workplace Stressors → Distress via<br>EmoCope and Burnout | .03                   | 0.01      | 0.01            | [0.01, 0.03]       | .020     |
| Workplace Stressors → Distress via<br>Burnout             | .05                   | 0.05      | 0.02            | [0.01, 0.10]       | .004     |
| EmoCope → Distress via Burnout                            | .06                   | 0.05      | 0.03            | [0.01, 0.12]       | .026     |
| Adversity Exposure → Burnout via<br>EmoCope               | .06                   | 0.09      | 0.05            | [0.02, 0.21]       | .015     |
| Workplace Stressors → Burnout via<br>EmoCope              | .08                   | 0.09      | 0.06            | [0.01, 0.23]       | .027     |
| <b>Total Effects</b>                                      |                       |           |                 |                    |          |
| Adversity Exposure → Distress                             | .07                   | 0.04      | 0.05            | [-.06, 0.13]       | .427     |
| Workplace Stressors → Distress                            | .65                   | 0.23      | 0.05            | [0.14, 0.32]       | .001     |
| EmoCope → Distress                                        | .06                   | 0.05      | 0.03            | [0.01, 0.12]       | .026     |
| Burnout → Distress                                        | .33                   | 0.10      | 0.03            | [0.03, 0.16]       | .007     |
| Outcome Variable                                          | <i>R</i> <sup>2</sup> | <i>SE</i> | 95% CI [LL, UL] |                    | <i>p</i> |
| Negative Emotion-Focused Coping                           | .38                   | 0.08      | [0.22, 0.52]    |                    | .001     |
| Burnout                                                   | .42                   | 0.10      | [0.19, 0.58]    |                    | .001     |
| Psychological Distress                                    | .55                   | 0.09      | [0.33, 0.69]    |                    | .001     |

*Note.* *N* = 111, bootstrapped for 5,000 replications. *SE*: bootstrap standard error. EmoCope: negative emotion-focused coping. CI: bias-corrected bootstrap confidence interval. LL: lower limit. UL: upper limit.
